# Supplementary material for: Physiological and Proteomic Responses of the Tetraploid Robinia pseudoacacia L. to High CO2 Levels
Source: MDPI journal article supplement (doi:10.3390/ijms25105262), 2024-05-11
Supplement: s1 [file s1]

**Table S1. Sequences of the primers**

| Primer name          | Primer sequence (5'-3')                          |
|----------------------|--------------------------------------------------|
| <i>18S</i> -rRNA-F/R | TAGTTGGTGGAGCGATTTGTC<br>CAGAACATCTAAGGGCATCACAG |
| <i>rbcL</i> -F/R     | TGAATGTCTTCGTGGGGGAC<br>AAACGGTCTCTCCAACGCAT     |
| 100776011-F/R        | TGATGGGAATCAACGGCCAG<br>AGCACACTGTGAGATGGCAG     |
| 100500504-F/R        | TACCGTGAGCACAAACAGGTC<br>GCGATGAAGCTGATGCACTGK   |
| 100780886-F/R        | TCGTGGGGCTTGTCTTTCTCTC<br>AAGGAAGCACCTGCTGTGTGT  |
| 100804915-F/R        | GTGTGAAGACAGGTTTGCAGG<br>TTTGAACCATTGAACTCCACCTC |
| COX3-F/R             | GCTACCGTTTCACTGGCTCT<br>ACGTGATGCTCCTTGGTCAG     |

**Table S2. Candidate proteins responsive to high CO<sub>2</sub> treatment**

| Protein name                                                             | UniProtEntry                         |
|--------------------------------------------------------------------------|--------------------------------------|
| Ribulose biphosphate carboxylase large chain (EC 4.1.1.39)<br>(Fragment) | A0A0F6Y5S8/ C0J370/<br>I6QMJ2        |
| Ribulose-1,5-bisphosphate carboxylase/oxygenase large subunit            | A0A898CTM2                           |
| Photosystem II CP43 reaction center protein                              | A0A6H0EHP1                           |
| Photosystem II CP47 reaction center protein                              | A0A898CWR3/A0A1C7D4D5                |
| Photosystem II CP44 reaction center protein                              | A0A898CTK1                           |
| Photosystem I P700 chlorophyll a apoprotein A2                           | A0A1C7D3U7/A0A1C7D4C6                |
| Photosystem I P700 chlorophyll a apoprotein A1                           | A0A6H0EHR0/A0A1C7D3T6                |
| Photosystem II protein D1                                                | A0A898CTN3                           |
| Photosystem II D2 protein                                                | A0A1C7D3T6/A0A1C7D3V4/<br>A0A898CVS6 |
| Photosystem I subunit VII                                                | A0A898CW14                           |
| Photosystem I reaction center subunit II                                 | I3STB2                               |
| Cytochrome f                                                             | A0A1C7D3W5                           |
| Plastoquinol-plastocyanin reductase                                      | I1LUB3/I3RZ73                        |
| Chlorophyll a-b binding protein                                          | A0A0R0FRF8/I3SIW2                    |
| Photosystem I P700 chlorophyll a apoprotein A2                           | A0A898CW46                           |
| Photosystem I iron-sulfur center                                         | A0A1C7D3Z6                           |
| Glutathione peroxidase                                                   | I1KP94/I3SK85                        |
| Glutathione-disulfide reductase                                          | I3T078                               |
| Glutamine synthetase                                                     | A0A0R4J3P1                           |
| CPSase-sm-chain domain-containing protein                                | I1KBF7                               |

---

|                                                                    |                         |
|--------------------------------------------------------------------|-------------------------|
| Tau class glutathione S-transferase                                | K7KDM7                  |
| Allene oxide synthase                                              | A0MAV5                  |
| Peroxidase (EC 1.11.1.7)                                           | A0A0R0KJA5/ A0A0R0ERX9  |
| Tau class glutathione S-transferase                                | C6T460/I1K5J3/C6TAT2    |
| Glutamine synthetase (EC 6.3.1.2)                                  | A0A0R0EVM7              |
| Lactoylglutathione lyase (Glyoxalase I)                            | I1LR74                  |
| Uncharacterized protein                                            | C6T2G1/ C6TAW8          |
| Glutathione peroxidase                                             | I1MX60/ C6SY48          |
| Peroxidase (EC 1.11.1.7)                                           | I1LHW6                  |
| Cytochrome c oxidase subunit 2 (EC 7.1.1.9)                        | P05491                  |
| Cytochrome b6                                                      | A0A898CTT0              |
| Cytochrome b-c1 complex subunit Rieske, mitochondrial (EC 7.1.1.8) | C6THW5                  |
| 3Cytochrome b-c1 complex subunit 7                                 | I1MWP7                  |
| Cytochrome f                                                       | A0A0R0H975              |
| NADH dehydrogenase subunit I                                       | A0A898CVZ3              |
| 6-phosphogluconate dehydrogenase, decarboxylating (EC 1.1.1.44)    | I1KWM7                  |
| NAD(P)H dehydrogenase (quinone) (EC 1.6.5.2)                       | A0A0R4J3V9/ A0A0R0GRT9/ |
|                                                                    | I1LT63                  |
| NADH dehydrogenase subunit 7                                       | A0A898CWS3              |
| Chalcone synthase (EC 2.3.1.74)                                    | I1LG10                  |
| Chalcone-flavonone isomerase family protein                        | C6SWQ7                  |
| Phenylalanine ammonia-lyase (EC 4.3.1.24)                          | I1NA96/A0A0R0KUR1       |

---
