# Supplementary material for: Physiological and Proteomic Responses of the Tetraploid Robinia pseudoacacia L. to High CO2 Levels
Source: MDPI journal article supplement (doi:10.3390/ijms25105262), 2024-05-11
Supplement: s1 [file s1]

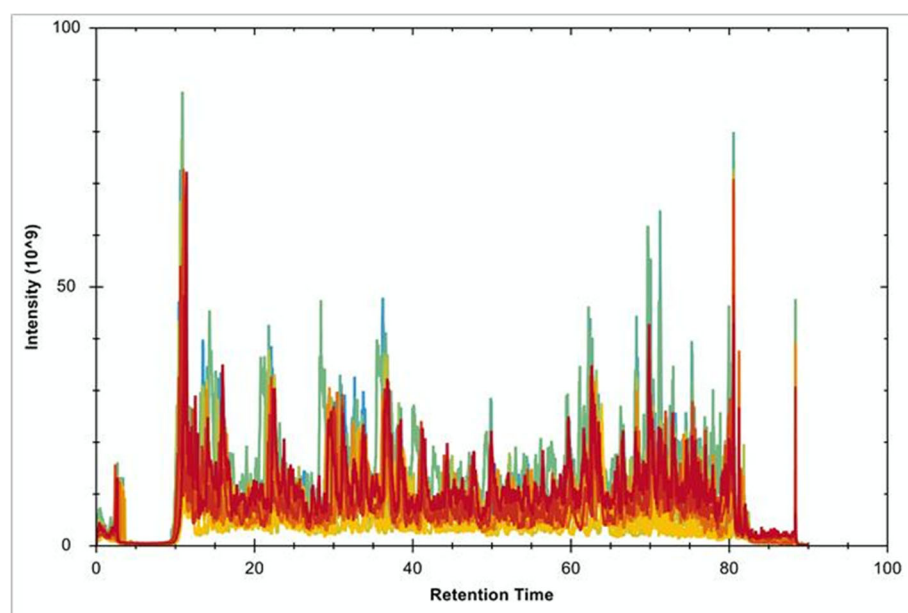

**Supplementary Figure 1.** Total ion chromatogram of tetraploid *Robinia pseudoacacia*

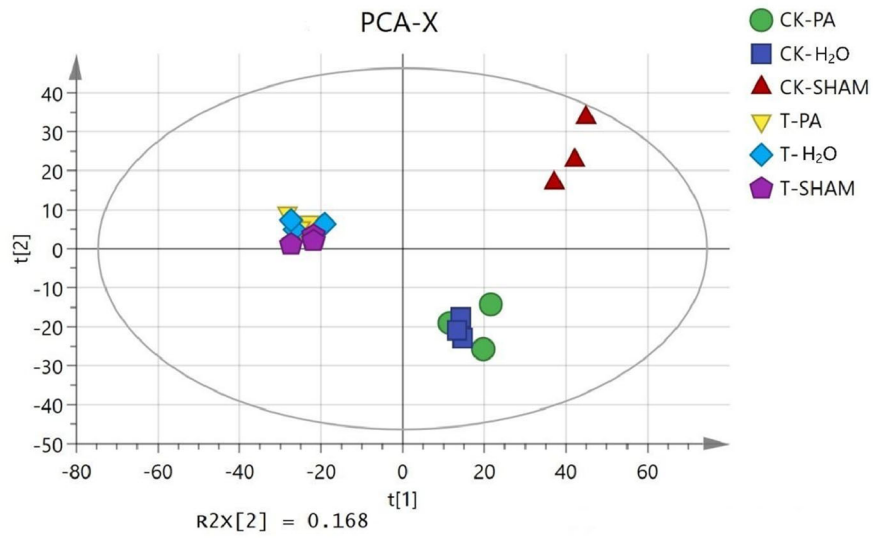

**Supplementary Figure 2.** Principal Component Analysis (PCA) score plots of the protein profiles of leaves in *Robinia pseudoacacia*. The experiment was carried out with three biological replicates.

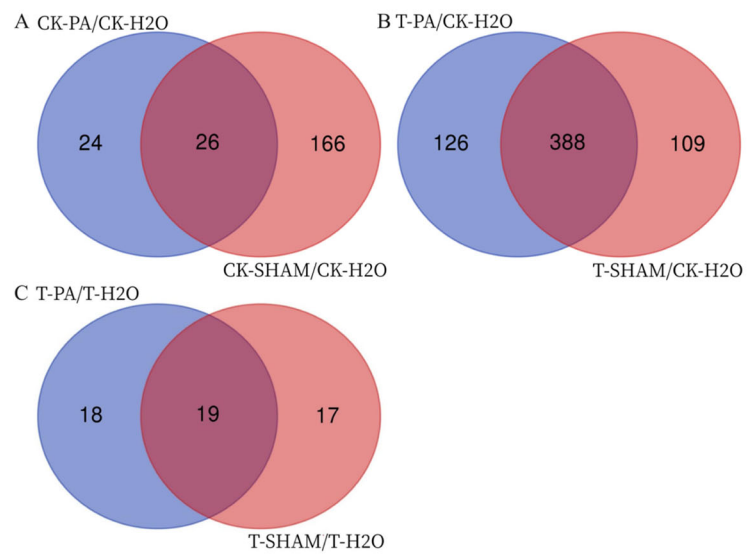

**Supplementary Figure 3.** Venn diagrams of DAPs in *Robinia pseudoacacia* under high CO<sub>2</sub>.

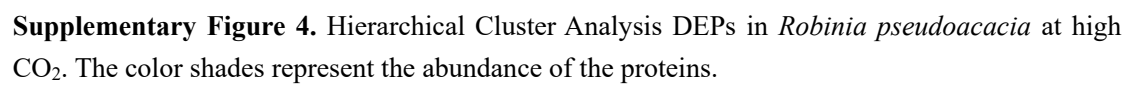

**Supplementary Figure 4.** Hierarchical Cluster Analysis DEPs in *Robinia pseudoacacia* at high CO<sub>2</sub>. The color shades represent the abundance of the proteins.

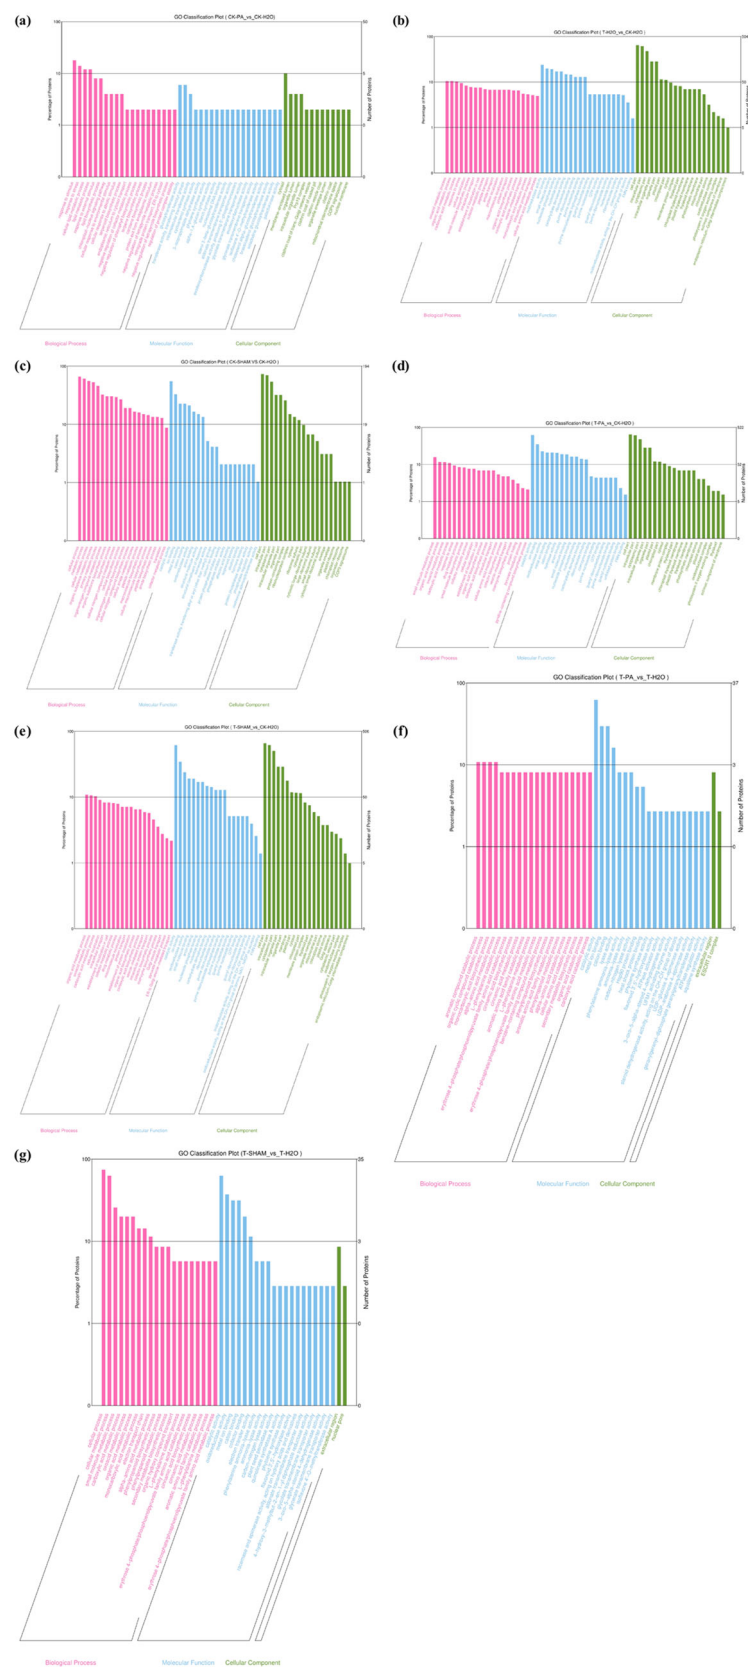

**Supplementary Figure 5.** GO enrichment clusters of DAPs in *Robinia pseudoacacia* at high CO<sub>2</sub>. The color shades represent the abundance of the proteins.

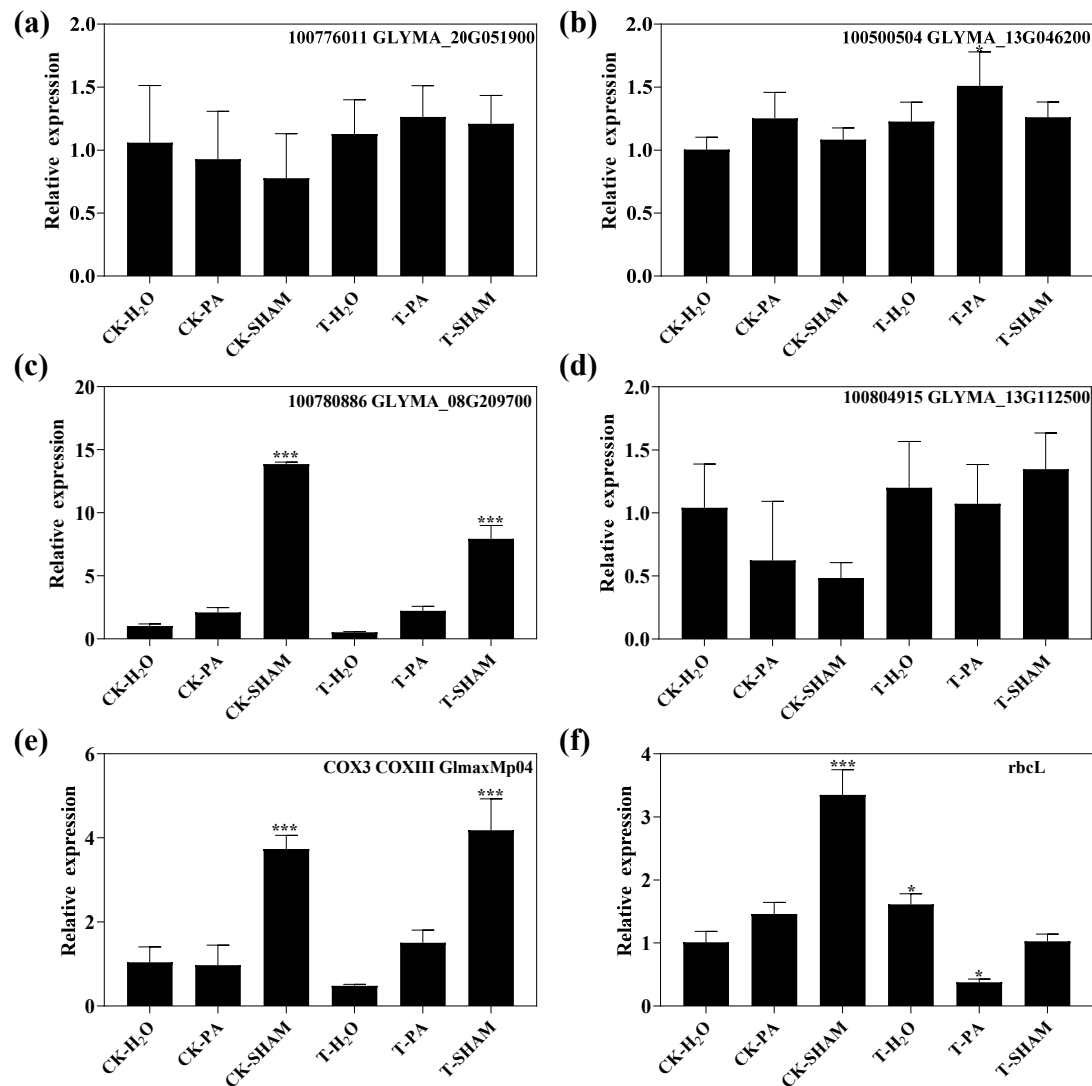

**Supplementary Figure 6.** The relative gene expression changes of DAPs were analysed by qRT-PCR for (a) 100776011 GLYMA\_20G051900 (protein marker); (b) 100500504 GLYMA\_13G046200; (c) 100780886 GLYMA\_08G209700; (d) 100804915 GLYMA\_13G112500; (e) COX3 COXIII GmaxMp04 and (f) rbcL in *Robinia pseudoacacia* at high CO<sub>2</sub>. Three biological replicates were analyzed, and the error bars represent SE. Asterisks indicate significant difference as determined by independent *t*-test. (\*  $P \leq 0.05$ , \*\*  $P \leq 0.01$ , \*\*\*  $P \leq 0.001$ ).
